# Supplementary material for: Vibrationally resolved emission spectra of luminescent conjugated oligothiophenes from anharmonic calculations
Source: Royal Society of Chemistry journal article supplement (doi:10.1039/c9cp03039e), 2019-01-01
Supplement: c9cp03039e1.pdf [file c9cp03039e1.pdf]

# Electronic Supplementary Information to Vibrationally Resolved Emission Spectra of Luminescent Conjugated Oligothiophenes from Anharmonic Calculations

Diana Madsen, Ove Christiansen, Patrick Norman and Carolin König

## Contents

|          |                                                                                                |           |
|----------|------------------------------------------------------------------------------------------------|-----------|
| <b>1</b> | <b>Computational settings for the wave-function calculations</b>                               | <b>2</b>  |
| <b>2</b> | <b>Spectra for <i>trans</i>-bithiophene</b>                                                    | <b>3</b>  |
| <b>3</b> | <b>Mode ranking</b>                                                                            | <b>4</b>  |
| 3.1      | <i>trans</i> -bithiophene in normal coordinates . . . . .                                      | 4         |
| 3.2      | <i>cis</i> -bithiophene in normal coordinates . . . . .                                        | 5         |
| 3.3      | <i>all-trans</i> -terthiophene in normal coordinates . . . . .                                 | 5         |
| 3.4      | <i>all-trans</i> -terthiophene with two groups, no constraints in normal coordinates . . . . . | 7         |
| 3.5      | <i>all-trans</i> -terthiophene with two groups, frozen OH in FALCON coordinates . . . . .      | 8         |
| 3.6      | <i>all-trans</i> -terthiophene with four groups, frozen OH in FALCON coordinates . . . . .     | 10        |
| 3.7      | <i>all-trans</i> -quaterthiophene in normal coordinates . . . . .                              | 12        |
| 3.8      | <i>all-trans</i> -pentathiophene in normal coordinates . . . . .                               | 13        |
| 3.9      | <i>all-cis</i> -pentathiophene in normal coordinates . . . . .                                 | 15        |
| 3.10     | <i>trans-cis-cis-trans</i> -pentathiophene in normal coordinates . . . . .                     | 17        |
| <b>4</b> | <b>Excited-state structures</b>                                                                | <b>19</b> |

# 1 Computational settings for the wave-function calculations

Table S-1: Computational details for the calculations for the different molecules, conformations, harmonic and anharmonic calculations with varying number of modes, presented in the main text: Number of VSCF modals, level of couplings in VCI (VCI[n]) and the number of calculated VCI eigenvalues for the ground state. For the excited state, only the first VCI eigenvalue is calculated. Bi-, ter-, quater- and pentathiophene have been abbreviated 2T, 3T, 4T and 5T. The calculation types are anharmonic (anh.), harmonic (harm.) and either coupled or without couplings (no coup.). Calculations denoted by "Anharmonic" include couplings if more than one mode is included. The number of VSCF modals for each mode has been presented in brackets with comma separations.

| Structure                         | Calculation    | Modes | No. VSCF of modals | VCI[n] | No. of eigenvalues |
|-----------------------------------|----------------|-------|--------------------|--------|--------------------|
| <i>trans</i> -2T                  | Anharmonic     | 1     | [30]               | 1      | 20                 |
| <i>trans</i> -2T                  | Anharmonic     | 2     | [20,20]            | 2      | 200                |
| <i>trans</i> -2T                  | Anharmonic     | 3     | [20, 20, 10]       | 3      | 300                |
| <i>trans</i> -2T                  | Anharmonic     | 4     | [10,10,10,10]      | 4      | 1500               |
| <i>trans</i> -2T                  | Anharmonic     | 5     | [8,8,8,8,8]        | 4      | 2000               |
| <i>trans</i> -2T                  | Anharmonic     | 5     | [8,8,8,8,8]        | 5      | 1800               |
| <i>trans</i> -2T                  | Harm. no coup. | 5     | [8,8,8,8,8]        | 5      | 2200               |
| <i>trans</i> -2T                  | Harm. coupled  | 5     | [8,8,8,8,8]        | 5      | 2200               |
| <i>trans</i> -2T                  | Anh. no coup.  | 5     | [8,8,8,8,8]        | 5      | 2200               |
| <i>cis</i> -2T                    | Anharmonic     | 3     | [20, 20, 10]       | 3      | 300                |
| <i>all-trans</i> -3T              | Anharmonic     | 1     | [30]               | 1      | 20                 |
| <i>all-trans</i> -3T              | Anharmonic     | 4     | [8,8,8,8]          | 4      | 900                |
| <i>all-trans</i> -3T, 2 groups NC | Anharmonic     | 2     | [20,20]            | 2      | 200                |
| <i>all-trans</i> -3T, 2 groups    | Anharmonic     | 2     | [50,50]            | 2      | 50                 |
| <i>all-trans</i> -3T, 4 groups    | Anharmonic     | 2     | [30,30]            | 2      | 50                 |
| <i>all-trans</i> -4T              | Anharmonic     | 1     | [30]               | 1      | 20                 |
| <i>all-trans</i> -4T              | Anharmonic     | 4     | [8,8,8,8]          | 4      | 1000               |
| <i>all-trans</i> -5T              | Anharmonic     | 1     | [50]               | 1      | 30                 |
| <i>all-trans</i> -5T              | Anharmonic     | 4     | [8,8,8,8]          | 4      | 1500               |
| <i>all-cis</i> -5T                | Anharmonic     | 4     | [8,8,8,8]          | 4      | 1000               |
| <i>trans-cis-cis-trans</i> -5T    | Anharmonic     | 4     | [8,8,8,8]          | 4      | 1000               |

## 2 Spectra for *trans*-bithiophene

In Fig. S-1(a) we present the same calculation as in Fig. 3(b) in the main text, with the two highest ranked modes, however, with a Lorentzian broadening of 0.05 eV instead of 0.04 eV. The resulting spectrum is very similar to that including the three highest ranked modes, but a broadening of 0.04 eV [c.f. Fig. 3(c)] in the main text. The third-highest ranked mode has with  $387\text{ cm}^{-1}$  a rather low harmonic vibrational frequency [c.f. Table 1 in the main text]. It is evident from this example, that the effect of a low-lying frequency can be seen as adding to the overall broadening of the spectrum.

The spectrum including the four highest ranked modes is presented in Fig. S-1(b), and looks indistinguishable from the spectrum with five modes presented in the in Fig. 3(d) in the main text.

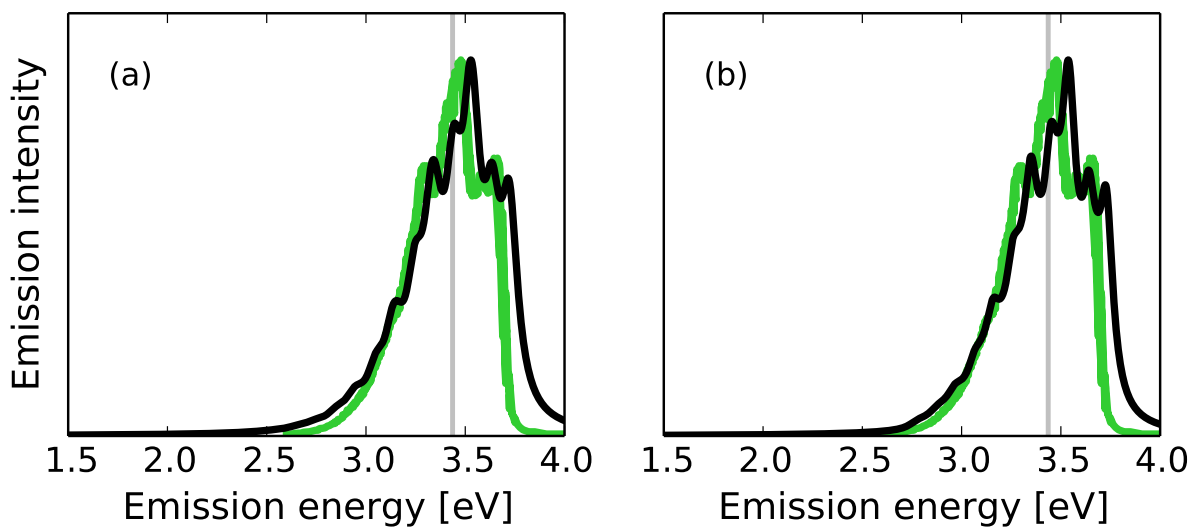

Figure S-1: Anharmonic emission spectra for the  $S_1 \rightarrow S_0$  transition of *trans*-bithiophene and experimental spectra (at 77 K in ethanol) from Ref. 19 in the main text. The calculated spectra are represented with black lines, the experiment with green lines and the vertical electronic emission energy with gray lines. (a) Including the two highest ranked modes with half-width at half-maximum of 0.05 eV. (b) Including the four highest ranked modes with half-width at half-maximum of 0.04 eV.

### 3 Mode ranking

In the tables to follow, we present all the modes ranked for each structure. This includes the absolute value of the dimensionless displacement  $|\Delta_i|$ , harmonic frequency  $\nu$  in  $\text{cm}^{-1}$  and type, sorted according to  $|\Delta_i|$ . The type is given for a selected few number of the highest ranked modes. The rows written in bold have a dimensionless displacement larger than or equal to 0.6 and a harmonic frequency larger than  $161 \text{ cm}^{-1}$ .

#### 3.1 *trans*-bithiophene in normal coordinates

| Mode      | $ \Delta_i $    | $\nu$       | type                          |
|-----------|-----------------|-------------|-------------------------------|
| <b>14</b> | <b>1.42e+00</b> | <b>674</b>  | <b>Ring breathing</b>         |
| <b>36</b> | <b>1.35e+00</b> | <b>1658</b> | <b>Inter-ring C–C stretch</b> |
| <b>7</b>  | <b>8.24e-01</b> | <b>387</b>  | <b>Chain deformation</b>      |
| 5         | 5.29e-01        | 290         | Inter-ring stretch            |
| 29        | 4.46e-01        | 1214        | C–S stretch                   |
| 35        | 3.19e-01        | 1510        |                               |
| 17        | 3.18e-01        | 713         |                               |
| 30        | 2.85e-01        | 1322        |                               |
| 26        | 1.77e-01        | 1111        |                               |
| 25        | 1.74e-01        | 1108        |                               |
| 33        | 1.29e-01        | 1455        |                               |
| 20        | 7.02e-02        | 875         |                               |
| 40        | 2.01e-02        | 3263        |                               |
| 38        | 1.63e-02        | 3247        |                               |
| 42        | 1.17e-02        | 3288        |                               |
| 41        | 2.85e-03        | 3287        |                               |
| 37        | 1.84e-03        | 3247        |                               |
| 27        | 6.94e-04        | 1115        |                               |
| 39        | 6.10e-04        | 3262        |                               |
| 24        | 5.70e-04        | 1102        |                               |
| 31        | 3.69e-04        | 1330        |                               |
| 32        | 2.15e-04        | 1450        |                               |
| 3         | 2.01e-04        | 117         |                               |
| 1         | 1.23e-04        | 69          |                               |
| 28        | 1.16e-04        | 1157        |                               |
| 15        | 6.98e-05        | 695         |                               |
| 34        | 6.64e-05        | 1490        |                               |
| 9         | 3.36e-05        | 510         |                               |
| 2         | 2.94e-05        | 88          |                               |
| 16        | 2.54e-05        | 711         |                               |
| 6         | 2.08e-05        | 350         |                               |
| 13        | 1.49e-05        | 661         |                               |
| 21        | 1.33e-05        | 892         |                               |
| 10        | 1.17e-05        | 561         |                               |
| 8         | 1.16e-05        | 452         |                               |
| 4         | 9.99e-06        | 171         |                               |
| 19        | 7.79e-06        | 840         |                               |
| 12        | 7.25e-06        | 647         |                               |
| 11        | 5.21e-06        | 570         |                               |
| 18        | 4.22e-06        | 716         |                               |
| 22        | 8.41e-07        | 921         |                               |
| 23        | 5.07e-07        | 922         |                               |

### 3.2 *cis*-bithiophene in normal coordinates

| Mode      | $ \Delta_i $    | $\nu$       | type                          |
|-----------|-----------------|-------------|-------------------------------|
| <b>12</b> | <b>1.50e+00</b> | <b>626</b>  | <b>Ring breathing</b>         |
| <b>36</b> | <b>1.36e+00</b> | <b>1649</b> | <b>Inter-ring C–C stretch</b> |
| <b>5</b>  | <b>8.14e-01</b> | <b>322</b>  | <b>Inter-ring stretch</b>     |
| 3         | 5.89e-01        | 115         | Inter-ring bending            |
| 28        | 5.87e-01        | 1162        | C–H bending                   |
| 30        | 2.87e-01        | 1318        |                               |
| 34        | 2.57e-01        | 1489        |                               |
| 26        | 2.27e-01        | 1111        |                               |
| 32        | 1.91e-01        | 1452        |                               |
| 24        | 1.83e-01        | 1070        |                               |
| 18        | 1.49e-01        | 721         |                               |
| 40        | 2.39e-02        | 3273        |                               |
| 20        | 1.92e-02        | 872         |                               |
| 42        | 1.35e-02        | 3289        |                               |
| 38        | 9.89e-03        | 3249        |                               |
| 35        | 3.30e-03        | 1489        |                               |
| 41        | 1.92e-03        | 3289        |                               |
| 27        | 4.59e-04        | 1118        |                               |
| 1         | 3.37e-04        | 62          |                               |
| 25        | 2.69e-04        | 1102        |                               |
| 39        | 1.95e-04        | 3267        |                               |
| 31        | 1.95e-04        | 1341        |                               |
| 11        | 1.08e-04        | 585         |                               |
| 33        | 9.06e-05        | 1465        |                               |
| 37        | 8.43e-05        | 3248        |                               |
| 29        | 6.69e-05        | 1221        |                               |
| 6         | 6.61e-05        | 339         |                               |
| 2         | 3.85e-05        | 86          |                               |
| 7         | 2.76e-05        | 353         |                               |
| 15        | 2.10e-05        | 706         |                               |
| 8         | 1.86e-05        | 460         |                               |
| 19        | 1.63e-05        | 858         |                               |
| 14        | 1.15e-05        | 659         |                               |
| 17        | 1.02e-05        | 717         |                               |
| 23        | 9.62e-06        | 922         |                               |
| 9         | 7.76e-06        | 488         |                               |
| 21        | 7.66e-06        | 901         |                               |
| 13        | 5.87e-06        | 639         |                               |
| 10        | 5.68e-06        | 558         |                               |
| 22        | 4.42e-06        | 922         |                               |
| 16        | 2.41e-06        | 709         |                               |
| 4         | 1.74e-06        | 176         |                               |

### 3.3 *all-trans*-terthiophene in normal coordinates

| Mode      | $ \Delta_i $    | $\nu$       | type                          |
|-----------|-----------------|-------------|-------------------------------|
| <b>55</b> | <b>1.31e+00</b> | <b>1631</b> | <b>Inter-ring C–C stretch</b> |
| <b>24</b> | <b>1.05e+00</b> | <b>697</b>  | <b>Ring breathing</b>         |
| <b>8</b>  | <b>9.25e-01</b> | <b>210</b>  | <b>Inter-ring stretch</b>     |
| <b>10</b> | <b>7.41e-01</b> | <b>350</b>  | <b>Chain deformation</b>      |
| 45        | 4.54e-01        | 1264        | Inner-ring C–S stretch        |
| 26        | 2.85e-01        | 740         |                               |
| 54        | 2.53e-01        | 1557        |                               |
| 18        | 2.42e-01        | 589         |                               |

|    |          |      |
|----|----------|------|
| 52 | 2.33e-01 | 1504 |
| 38 | 1.79e-01 | 1105 |
| 40 | 1.47e-01 | 1118 |
| 3  | 1.41e-01 | 71   |
| 43 | 1.40e-01 | 1220 |
| 47 | 7.32e-02 | 1346 |
| 32 | 5.54e-02 | 894  |
| 41 | 4.82e-02 | 1132 |
| 30 | 4.69e-02 | 848  |
| 57 | 1.29e-02 | 3244 |
| 61 | 1.22e-02 | 3262 |
| 60 | 8.75e-03 | 3258 |
| 50 | 4.20e-03 | 1466 |
| 63 | 3.54e-03 | 3290 |
| 62 | 2.25e-03 | 3290 |
| 37 | 9.83e-04 | 1103 |
| 59 | 8.88e-04 | 3258 |
| 25 | 7.65e-04 | 738  |
| 23 | 6.34e-04 | 693  |
| 56 | 5.73e-04 | 3244 |
| 1  | 4.24e-04 | 35   |
| 44 | 3.17e-04 | 1247 |
| 39 | 2.30e-04 | 1117 |
| 7  | 1.77e-04 | 174  |
| 4  | 6.66e-05 | 87   |
| 53 | 6.66e-05 | 1548 |
| 2  | 6.36e-05 | 52   |
| 27 | 5.63e-05 | 750  |
| 29 | 5.08e-05 | 787  |
| 11 | 4.95e-05 | 362  |
| 15 | 4.43e-05 | 513  |
| 22 | 3.51e-05 | 689  |
| 13 | 3.11e-05 | 442  |
| 6  | 2.84e-05 | 150  |
| 9  | 2.54e-05 | 281  |
| 5  | 2.20e-05 | 111  |
| 35 | 1.97e-05 | 933  |
| 12 | 1.69e-05 | 391  |
| 42 | 1.58e-05 | 1172 |
| 49 | 1.50e-05 | 1440 |
| 31 | 1.50e-05 | 863  |
| 48 | 1.46e-05 | 1396 |
| 46 | 1.38e-05 | 1329 |
| 34 | 1.13e-05 | 913  |
| 21 | 1.12e-05 | 685  |
| 20 | 9.35e-06 | 638  |
| 28 | 8.58e-06 | 783  |
| 58 | 7.81e-06 | 3245 |
| 33 | 4.64e-06 | 899  |
| 36 | 2.34e-06 | 933  |
| 16 | 1.90e-06 | 551  |
| 51 | 8.96e-07 | 1490 |
| 17 | 6.62e-07 | 586  |
| 19 | 4.23e-07 | 621  |
| 14 | 4.16e-07 | 470  |

### 3.4 *all-trans*-terthiophene with two groups, no constraints in normal coordinates

| Mode      | $ \Delta_i $    | $\nu$       | type                          |
|-----------|-----------------|-------------|-------------------------------|
| <b>85</b> | <b>1.27e+00</b> | <b>1635</b> | <b>Inter-ring C–C stretch</b> |
| 2         | 9.47e-01        | 19          | Internal rotation             |
| <b>14</b> | <b>8.43e-01</b> | <b>193</b>  | <b>Inter-ring stretch</b>     |
| 1         | 7.65e-01        | 14          | Internal rotation             |
| <b>42</b> | <b>7.48e-01</b> | <b>725</b>  | <b>Ring breathing</b>         |
| <b>24</b> | <b>6.80e-01</b> | <b>405</b>  | <b>Chain deformation</b>      |
| 6         | 6.61e-01        | 35          |                               |
| 13        | 4.72e-01        | 165         |                               |
| 40        | 4.32e-01        | 707         |                               |
| 37        | 4.08e-01        | 634         |                               |
| 69        | 4.05e-01        | 1270        |                               |
| 12        | 3.95e-01        | 146         |                               |
| 83        | 3.28e-01        | 1582        |                               |
| 84        | 3.14e-01        | 1591        |                               |
| 38        | 2.80e-01        | 675         |                               |
| 4         | 2.72e-01        | 27          |                               |
| 7         | 2.27e-01        | 52          |                               |
| 32        | 2.23e-01        | 589         |                               |
| 41        | 2.17e-01        | 713         |                               |
| 3         | 2.12e-01        | 22          |                               |
| 67        | 2.00e-01        | 1251        |                               |
| 44        | 1.95e-01        | 755         |                               |
| 43        | 1.90e-01        | 750         |                               |
| 78        | 1.63e-01        | 1475        |                               |
| 59        | 1.54e-01        | 1126        |                               |
| 5         | 1.29e-01        | 29          |                               |
| 33        | 1.10e-01        | 595         |                               |
| 17        | 1.09e-01        | 272         |                               |
| 23        | 1.06e-01        | 395         |                               |
| 48        | 1.06e-01        | 849         |                               |
| 64        | 9.36e-02        | 1202        |                               |
| 27        | 8.76e-02        | 465         |                               |
| 39        | 8.39e-02        | 694         |                               |
| 54        | 8.38e-02        | 912         |                               |
| 34        | 8.23e-02        | 603         |                               |
| 80        | 7.99e-02        | 1492        |                               |
| 79        | 7.60e-02        | 1488        |                               |
| 68        | 7.13e-02        | 1265        |                               |
| 19        | 7.04e-02        | 301         |                               |
| 75        | 6.89e-02        | 1397        |                               |
| 11        | 6.82e-02        | 123         |                               |
| 71        | 6.74e-02        | 1298        |                               |
| 63        | 6.58e-02        | 1192        |                               |
| 55        | 6.14e-02        | 972         |                               |
| 15        | 5.90e-02        | 239         |                               |
| 73        | 5.77e-02        | 1327        |                               |
| 20        | 5.45e-02        | 336         |                               |
| 26        | 5.43e-02        | 460         |                               |
| 25        | 4.60e-02        | 453         |                               |
| 65        | 4.40e-02        | 1218        |                               |
| 82        | 4.39e-02        | 1531        |                               |
| 21        | 4.36e-02        | 341         |                               |
| 29        | 4.22e-02        | 533         |                               |
| 70        | 4.18e-02        | 1295        |                               |

|    |          |      |
|----|----------|------|
| 56 | 4.15e-02 | 978  |
| 77 | 4.06e-02 | 1438 |
| 35 | 3.86e-02 | 616  |
| 72 | 3.68e-02 | 1311 |
| 50 | 3.53e-02 | 882  |
| 22 | 3.24e-02 | 365  |
| 66 | 3.16e-02 | 1230 |
| 61 | 3.16e-02 | 1154 |
| 76 | 3.00e-02 | 1421 |
| 81 | 2.94e-02 | 1518 |
| 9  | 2.86e-02 | 85   |
| 60 | 2.81e-02 | 1152 |
| 51 | 2.77e-02 | 898  |
| 45 | 2.56e-02 | 775  |
| 58 | 2.50e-02 | 1014 |
| 8  | 2.48e-02 | 67   |
| 57 | 2.36e-02 | 1010 |
| 46 | 2.23e-02 | 784  |
| 53 | 1.77e-02 | 910  |
| 62 | 1.61e-02 | 1173 |
| 36 | 1.59e-02 | 621  |
| 10 | 1.55e-02 | 102  |
| 31 | 1.36e-02 | 571  |
| 92 | 1.35e-02 | 3237 |
| 95 | 1.20e-02 | 3261 |
| 28 | 1.14e-02 | 490  |
| 94 | 1.03e-02 | 3259 |
| 74 | 9.29e-03 | 1394 |
| 16 | 9.15e-03 | 264  |
| 87 | 8.73e-03 | 1902 |
| 18 | 7.53e-03 | 288  |
| 47 | 5.08e-03 | 802  |
| 49 | 4.27e-03 | 873  |
| 30 | 4.03e-03 | 550  |
| 96 | 3.39e-03 | 3277 |
| 97 | 1.78e-03 | 3315 |
| 91 | 1.32e-03 | 3105 |
| 88 | 1.18e-03 | 3051 |
| 99 | 1.11e-03 | 3782 |
| 89 | 9.85e-04 | 3054 |
| 90 | 8.98e-04 | 3096 |
| 93 | 7.94e-04 | 3245 |
| 52 | 5.23e-04 | 901  |
| 86 | 5.19e-04 | 1896 |
| 98 | 4.83e-04 | 3779 |

### 3.5 *all-trans*-terthiophene with two groups, frozen OH in FALCON coordinates

| Mode      | $ \Delta_i $    | $\nu$       | type                          |
|-----------|-----------------|-------------|-------------------------------|
| <b>75</b> | <b>1.27e+00</b> | <b>1635</b> | <b>Inter-ring C–C stretch</b> |
| <b>10</b> | <b>8.22e-01</b> | <b>216</b>  | <b>Inter-ring stretch</b>     |
| <b>34</b> | <b>7.93e-01</b> | <b>725</b>  | <b>Ring breathing</b>         |
| <b>17</b> | <b>6.18e-01</b> | <b>392</b>  | <b>Chain deformation</b>      |
| 31        | 5.47e-01        | 643         | Ring breathing                |
| 35        | 4.46e-01        | 725         | Ring breathing                |
| 61        | 4.01e-01        | 1271        |                               |
| 73        | 3.27e-01        | 1582        |                               |



|    |          |      |
|----|----------|------|
| 74 | 3.14e-01 | 1591 |
| 18 | 2.36e-01 | 395  |
| 59 | 2.00e-01 | 1250 |
| 13 | 1.76e-01 | 276  |
| 28 | 1.72e-01 | 594  |
| 68 | 1.67e-01 | 1474 |
| 4  | 1.62e-01 | 67   |
| 20 | 1.52e-01 | 454  |
| 53 | 1.51e-01 | 1126 |
| 60 | 1.35e-01 | 1265 |
| 27 | 1.32e-01 | 584  |
| 5  | 1.30e-01 | 87   |
| 40 | 1.23e-01 | 843  |
| 21 | 9.79e-02 | 457  |
| 56 | 9.34e-02 | 1201 |
| 30 | 8.60e-02 | 622  |
| 16 | 8.03e-02 | 363  |
| 70 | 7.98e-02 | 1492 |
| 46 | 7.75e-02 | 903  |
| 7  | 7.71e-02 | 123  |
| 69 | 7.69e-02 | 1487 |
| 29 | 6.53e-02 | 611  |
| 1  | 6.49e-02 | 39   |
| 23 | 6.27e-02 | 516  |
| 55 | 6.26e-02 | 1191 |
| 15 | 6.11e-02 | 306  |
| 12 | 6.11e-02 | 267  |
| 42 | 5.75e-02 | 861  |
| 47 | 5.72e-02 | 967  |
| 64 | 5.69e-02 | 1386 |
| 48 | 5.46e-02 | 972  |
| 22 | 5.31e-02 | 489  |
| 14 | 5.19e-02 | 290  |
| 2  | 5.09e-02 | 49   |
| 63 | 4.77e-02 | 1324 |
| 65 | 4.57e-02 | 1388 |
| 57 | 4.48e-02 | 1217 |
| 72 | 4.41e-02 | 1531 |
| 51 | 4.00e-02 | 1111 |
| 44 | 3.88e-02 | 889  |
| 24 | 3.87e-02 | 535  |
| 39 | 3.67e-02 | 790  |
| 67 | 3.40e-02 | 1435 |
| 32 | 3.31e-02 | 690  |
| 41 | 3.26e-02 | 848  |
| 25 | 3.11e-02 | 558  |
| 71 | 2.90e-02 | 1518 |
| 38 | 2.78e-02 | 781  |
| 6  | 2.68e-02 | 97   |
| 58 | 2.58e-02 | 1229 |
| 50 | 2.47e-02 | 1006 |
| 66 | 2.23e-02 | 1420 |
| 9  | 2.17e-02 | 170  |
| 19 | 2.05e-02 | 414  |
| 52 | 1.79e-02 | 1118 |
| 54 | 1.76e-02 | 1173 |
| 49 | 1.63e-02 | 1000 |
| 11 | 1.63e-02 | 238  |

|    |          |      |
|----|----------|------|
| 26 | 1.40e-02 | 580  |
| 82 | 1.35e-02 | 3237 |
| 85 | 1.20e-02 | 3261 |
| 36 | 1.06e-02 | 752  |
| 84 | 1.03e-02 | 3259 |
| 33 | 1.02e-02 | 698  |
| 8  | 9.65e-03 | 153  |
| 77 | 8.39e-03 | 1892 |
| 3  | 5.46e-03 | 61   |
| 86 | 3.39e-03 | 3277 |
| 62 | 2.42e-03 | 1303 |
| 87 | 1.78e-03 | 3315 |
| 81 | 1.32e-03 | 3105 |
| 78 | 1.18e-03 | 3051 |
| 43 | 1.12e-03 | 879  |
| 76 | 1.01e-03 | 1885 |
| 79 | 9.89e-04 | 3054 |
| 80 | 8.97e-04 | 3096 |
| 83 | 7.94e-04 | 3245 |
| 45 | 5.20e-04 | 901  |
| 37 | 2.68e-04 | 772  |

### 3.6 *all-trans*-terthiophene with four groups, frozen OH in FALCON coordinates

| Mode      | $ \Delta_i $    | $\nu$       | type                          |
|-----------|-----------------|-------------|-------------------------------|
| <b>81</b> | <b>1.23e+00</b> | <b>1612</b> | <b>Inter-ring C–C stretch</b> |
| <b>10</b> | <b>6.66e-01</b> | <b>215</b>  | <b>Inter-ring stretch</b>     |
| <b>40</b> | <b>6.31e-01</b> | <b>732</b>  | <b>Ring breathing</b>         |
| 37        | 5.05e-01        | 686         | Ring breathing                |
| 42        | 3.74e-01        | 736         | Ring breathing                |
| 28        | 3.57e-01        | 530         | Ring breathing                |
| 9         | 3.51e-01        | 177         |                               |
| 80        | 3.49e-01        | 1568        |                               |
| 14        | 3.28e-01        | 304         |                               |
| 63        | 3.20e-01        | 1258        |                               |
| 22        | 3.01e-01        | 458         |                               |
| 34        | 2.86e-01        | 620         |                               |
| 65        | 2.55e-01        | 1275        |                               |
| 17        | 2.50e-01        | 344         |                               |
| 74        | 2.18e-01        | 1489        |                               |
| 58        | 2.07e-01        | 1130        |                               |
| 7         | 2.04e-01        | 118         |                               |
| 25        | 1.97e-01        | 492         |                               |
| 67        | 1.91e-01        | 1284        |                               |
| 19        | 1.60e-01        | 396         |                               |
| 4         | 1.53e-01        | 99          |                               |
| 3         | 1.50e-01        | 82          |                               |
| 69        | 1.22e-01        | 1333        |                               |
| 77        | 1.10e-01        | 1524        |                               |
| 75        | 1.05e-01        | 1509        |                               |
| 12        | 9.90e-02        | 242         |                               |
| 83        | 9.84e-02        | 1766        |                               |
| 61        | 8.96e-02        | 1220        |                               |
| 46        | 8.81e-02        | 850         |                               |
| 52        | 8.59e-02        | 965         |                               |
| 31        | 8.01e-02        | 585         |                               |
| 59        | 7.93e-02        | 1134        |                               |

|    |          |      |
|----|----------|------|
| 45 | 7.26e-02 | 797  |
| 1  | 6.46e-02 | 63   |
| 55 | 5.53e-02 | 1044 |
| 48 | 3.59e-02 | 869  |
| 54 | 3.38e-02 | 1001 |
| 71 | 2.79e-02 | 1349 |
| 21 | 2.66e-02 | 417  |
| 29 | 2.59e-02 | 569  |
| 33 | 2.07e-02 | 616  |
| 93 | 1.02e-02 | 3265 |
| 43 | 9.55e-03 | 780  |
| 91 | 7.64e-03 | 3248 |
| 85 | 2.93e-03 | 1861 |
| 89 | 1.16e-03 | 3178 |
| 87 | 6.30e-04 | 3120 |
| 6  | 5.86e-04 | 116  |
| 88 | 3.41e-04 | 3178 |
| 8  | 3.23e-04 | 150  |
| 56 | 2.68e-04 | 1044 |
| 15 | 2.56e-04 | 306  |
| 76 | 2.06e-04 | 1509 |
| 11 | 1.06e-04 | 229  |
| 23 | 9.82e-05 | 465  |
| 2  | 7.84e-05 | 71   |
| 41 | 5.62e-05 | 736  |
| 57 | 5.30e-05 | 1125 |
| 5  | 4.35e-05 | 104  |
| 27 | 3.54e-05 | 526  |
| 32 | 3.19e-05 | 607  |
| 20 | 2.99e-05 | 403  |
| 26 | 2.66e-05 | 505  |
| 86 | 2.60e-05 | 3120 |
| 66 | 2.59e-05 | 1278 |
| 36 | 2.26e-05 | 666  |
| 13 | 2.19e-05 | 272  |
| 78 | 2.07e-05 | 1530 |
| 51 | 2.02e-05 | 964  |
| 38 | 2.02e-05 | 702  |
| 70 | 1.90e-05 | 1348 |
| 39 | 1.87e-05 | 715  |
| 47 | 1.80e-05 | 856  |
| 62 | 1.75e-05 | 1237 |
| 60 | 1.50e-05 | 1183 |
| 73 | 1.47e-05 | 1422 |
| 64 | 1.39e-05 | 1262 |
| 82 | 1.36e-05 | 1754 |
| 68 | 1.14e-05 | 1312 |
| 24 | 9.90e-06 | 487  |
| 16 | 9.71e-06 | 326  |
| 72 | 9.55e-06 | 1405 |
| 79 | 7.73e-06 | 1562 |
| 50 | 6.16e-06 | 926  |
| 18 | 4.19e-06 | 378  |
| 84 | 4.00e-06 | 1860 |
| 90 | 3.84e-06 | 3248 |
| 44 | 3.33e-06 | 795  |
| 53 | 3.22e-06 | 1001 |
| 30 | 2.63e-06 | 570  |

|    |          |      |
|----|----------|------|
| 35 | 1.45e-06 | 628  |
| 49 | 1.35e-06 | 890  |
| 92 | 5.54e-07 | 3249 |

### 3.7 *all-trans*-quaterthiophene in normal coordinates

| Mode      | $ \Delta_i $    | $\nu$       | type                          |
|-----------|-----------------|-------------|-------------------------------|
| <b>74</b> | <b>1.28e+00</b> | <b>1616</b> | <b>Inter-ring C–C stretch</b> |
| <b>9</b>  | <b>1.02e+00</b> | <b>162</b>  | <b>Inter-ring stretch</b>     |
| <b>32</b> | <b>8.94e-01</b> | <b>705</b>  | <b>Ring breathing</b>         |
| <b>15</b> | <b>6.93e-01</b> | <b>333</b>  | <b>Chain deformation</b>      |
| 61        | 4.06e-01        | 1277        | Inner-ring C–S–C stretch      |
| 71        | 3.58e-01        | 1548        |                               |
| 59        | 2.35e-01        | 1261        |                               |
| 28        | 2.31e-01        | 640         |                               |
| 52        | 2.09e-01        | 1118        |                               |
| 36        | 2.07e-01        | 751         |                               |
| 7         | 1.75e-01        | 106         |                               |
| 51        | 1.63e-01        | 1099        |                               |
| 69        | 1.53e-01        | 1500        |                               |
| 73        | 1.51e-01        | 1584        |                               |
| 34        | 9.61e-02        | 720         |                               |
| 54        | 6.95e-02        | 1125        |                               |
| 20        | 6.66e-02        | 476         |                               |
| 16        | 6.51e-02        | 385         |                               |
| 62        | 6.07e-02        | 1336        |                               |
| 64        | 4.77e-02        | 1397        |                               |
| 44        | 3.28e-02        | 910         |                               |
| 67        | 2.33e-02        | 1466        |                               |
| 57        | 2.28e-02        | 1221        |                               |
| 42        | 1.48e-02        | 863         |                               |
| 82        | 1.32e-02        | 3259        |                               |
| 60        | 1.30e-02        | 1261        |                               |
| 78        | 9.95e-03        | 3243        |                               |
| 80        | 4.02e-03        | 3257        |                               |
| 53        | 1.80e-03        | 1119        |                               |
| 84        | 1.32e-03        | 3291        |                               |
| 76        | 1.21e-03        | 3243        |                               |
| 10        | 1.21e-03        | 165         |                               |
| 83        | 1.07e-03        | 3291        |                               |
| 81        | 9.80e-04        | 3259        |                               |
| 79        | 8.21e-04        | 3257        |                               |
| 77        | 7.08e-04        | 3243        |                               |
| 50        | 5.11e-04        | 1095        |                               |
| 55        | 3.99e-04        | 1134        |                               |
| 33        | 1.96e-04        | 716         |                               |
| 4         | 1.68e-04        | 52          |                               |
| 75        | 1.42e-04        | 3243        |                               |
| 8         | 1.22e-04        | 128         |                               |
| 63        | 1.05e-04        | 1342        |                               |
| 70        | 1.01e-04        | 1524        |                               |
| 2         | 8.82e-05        | 35          |                               |
| 13        | 7.43e-05        | 299         |                               |
| 5         | 7.15e-05        | 61          |                               |
| 3         | 6.62e-05        | 43          |                               |
| 45        | 6.09e-05        | 910         |                               |
| 35        | 5.08e-05        | 749         |                               |
| 25        | 4.71e-05        | 595         |                               |

|    |          |      |
|----|----------|------|
| 29 | 4.58e-05 | 663  |
| 18 | 4.57e-05 | 411  |
| 26 | 4.51e-05 | 610  |
| 6  | 4.39e-05 | 83   |
| 58 | 4.33e-05 | 1234 |
| 66 | 3.93e-05 | 1434 |
| 12 | 3.65e-05 | 251  |
| 23 | 2.42e-05 | 564  |
| 72 | 2.08e-05 | 1575 |
| 37 | 2.03e-05 | 768  |
| 21 | 1.67e-05 | 505  |
| 68 | 1.62e-05 | 1492 |
| 11 | 1.62e-05 | 171  |
| 1  | 1.37e-05 | 22   |
| 17 | 1.31e-05 | 391  |
| 31 | 1.30e-05 | 701  |
| 65 | 1.26e-05 | 1401 |
| 39 | 1.20e-05 | 818  |
| 49 | 1.09e-05 | 936  |
| 27 | 1.02e-05 | 624  |
| 19 | 9.15e-06 | 468  |
| 41 | 8.13e-06 | 849  |
| 47 | 7.31e-06 | 922  |
| 56 | 5.83e-06 | 1188 |
| 30 | 4.58e-06 | 701  |
| 22 | 3.39e-06 | 537  |
| 40 | 3.18e-06 | 818  |
| 24 | 2.62e-06 | 586  |
| 48 | 2.17e-06 | 936  |
| 43 | 2.03e-06 | 880  |
| 38 | 1.69e-06 | 770  |
| 14 | 7.81e-07 | 312  |
| 46 | 9.65e-08 | 912  |

### 3.8 *all-trans*-pentathiophene in normal coordinates

| Mode      | $ \Delta_i $    | $\nu$       | type                          |
|-----------|-----------------|-------------|-------------------------------|
| 11        | 1.01e+00        | 137         | Inter-ring bendings           |
| <b>92</b> | <b>9.60e-01</b> | <b>1600</b> | <b>Inter-ring C–C stretch</b> |
| <b>91</b> | <b>8.35e-01</b> | <b>1592</b> | <b>Inter-ring C–C stretch</b> |
| <b>41</b> | <b>7.95e-01</b> | <b>711</b>  | <b>Ring breathing</b>         |
| <b>18</b> | <b>6.90e-01</b> | <b>323</b>  | <b>Chain deformation</b>      |
| 10        | 4.63e-01        | 123         |                               |
| 89        | 4.21e-01        | 1551        |                               |
| 77        | 3.48e-01        | 1281        |                               |
| 75        | 2.90e-01        | 1272        |                               |
| 66        | 2.80e-01        | 1114        |                               |
| 37        | 2.65e-01        | 663         |                               |
| 46        | 1.50e-01        | 756         |                               |
| 88        | 1.49e-01        | 1527        |                               |
| 64        | 1.36e-01        | 1095        |                               |
| 24        | 1.35e-01        | 427         |                               |
| 74        | 1.14e-01        | 1251        |                               |
| 20        | 1.07e-01        | 344         |                               |
| 86        | 7.72e-02        | 1499        |                               |
| 79        | 7.37e-02        | 1338        |                               |
| 32        | 7.18e-02        | 601         |                               |
| 43        | 6.69e-02        | 733         |                               |

|     |          |      |
|-----|----------|------|
| 67  | 5.03e-02 | 1124 |
| 71  | 3.40e-02 | 1221 |
| 84  | 3.15e-02 | 1468 |
| 59  | 2.24e-02 | 919  |
| 54  | 1.71e-02 | 876  |
| 69  | 1.59e-02 | 1137 |
| 52  | 1.52e-02 | 851  |
| 3   | 1.50e-02 | 29   |
| 82  | 1.21e-02 | 1412 |
| 102 | 9.53e-03 | 3257 |
| 103 | 9.07e-03 | 3259 |
| 76  | 8.22e-03 | 1273 |
| 12  | 6.90e-03 | 137  |
| 97  | 6.60e-03 | 3243 |
| 95  | 4.80e-03 | 3242 |
| 94  | 1.34e-03 | 3242 |
| 65  | 1.16e-03 | 1112 |
| 93  | 7.04e-04 | 1603 |
| 45  | 5.74e-04 | 755  |
| 101 | 5.70e-04 | 3257 |
| 105 | 5.36e-04 | 3291 |
| 100 | 5.21e-04 | 3257 |
| 98  | 4.96e-04 | 3243 |
| 104 | 4.96e-04 | 3291 |
| 2   | 2.59e-04 | 25   |
| 96  | 2.18e-04 | 3243 |
| 99  | 2.15e-04 | 3257 |
| 1   | 1.72e-04 | 14   |
| 19  | 1.27e-04 | 331  |
| 44  | 1.10e-04 | 735  |
| 5   | 8.27e-05 | 39   |
| 4   | 8.04e-05 | 35   |
| 90  | 6.82e-05 | 1569 |
| 8   | 6.61e-05 | 75   |
| 78  | 6.55e-05 | 1332 |
| 87  | 5.64e-05 | 1514 |
| 68  | 5.49e-05 | 1126 |
| 21  | 5.43e-05 | 365  |
| 85  | 4.31e-05 | 1497 |
| 6   | 3.60e-05 | 58   |
| 63  | 3.48e-05 | 1089 |
| 9   | 3.04e-05 | 81   |
| 14  | 2.59e-05 | 174  |
| 38  | 2.53e-05 | 674  |
| 72  | 2.44e-05 | 1240 |
| 81  | 2.37e-05 | 1389 |
| 80  | 1.83e-05 | 1384 |
| 39  | 1.46e-05 | 708  |
| 16  | 1.30e-05 | 248  |
| 34  | 1.23e-05 | 614  |
| 40  | 1.16e-05 | 708  |
| 26  | 1.14e-05 | 494  |
| 15  | 1.11e-05 | 231  |
| 17  | 1.09e-05 | 284  |
| 42  | 9.95e-06 | 717  |
| 70  | 9.61e-06 | 1197 |
| 7   | 8.62e-06 | 73   |
| 57  | 8.22e-06 | 916  |

|    |          |      |
|----|----------|------|
| 83 | 7.84e-06 | 1434 |
| 51 | 6.31e-06 | 834  |
| 47 | 5.01e-06 | 777  |
| 73 | 4.58e-06 | 1244 |
| 23 | 4.23e-06 | 422  |
| 53 | 4.04e-06 | 860  |
| 25 | 3.84e-06 | 466  |
| 33 | 3.70e-06 | 605  |
| 58 | 3.67e-06 | 917  |
| 36 | 3.58e-06 | 632  |
| 31 | 3.48e-06 | 586  |
| 48 | 3.41e-06 | 785  |
| 28 | 3.28e-06 | 525  |
| 61 | 2.70e-06 | 938  |
| 22 | 2.47e-06 | 395  |
| 50 | 2.37e-06 | 834  |
| 27 | 2.12e-06 | 495  |
| 56 | 2.07e-06 | 912  |
| 30 | 1.59e-06 | 569  |
| 62 | 1.53e-06 | 938  |
| 35 | 1.35e-06 | 623  |
| 29 | 1.33e-06 | 550  |
| 49 | 7.17e-07 | 789  |
| 13 | 7.15e-07 | 168  |
| 55 | 2.61e-07 | 896  |
| 60 | 2.43e-07 | 927  |

### 3.9 *all-cis*-pentathiophene in normal coordinates

| Mode      | $ \Delta_i $    | $\nu$       | type                          |
|-----------|-----------------|-------------|-------------------------------|
| <b>12</b> | <b>1.30e+00</b> | <b>168</b>  | <b>Inter-ring stretch</b>     |
| <b>93</b> | <b>1.07e+00</b> | <b>1591</b> | <b>Inter-ring C–C stretch</b> |
| <b>39</b> | <b>8.46e-01</b> | <b>658</b>  | <b>Ring breathing</b>         |
| <b>91</b> | <b>6.41e-01</b> | <b>1581</b> | <b>Inter-ring C–C stretch</b> |
| 73        | 5.42e-01        | 1214        | Inner-ring C–S–C stretch      |
| 3         | 4.40e-01        | 25          |                               |
| 89        | 3.39e-01        | 1538        |                               |
| 72        | 3.13e-01        | 1193        |                               |
| 38        | 2.62e-01        | 643         |                               |
| 88        | 2.62e-01        | 1527        |                               |
| 35        | 1.87e-01        | 624         |                               |
| 75        | 1.36e-01        | 1275        |                               |
| 21        | 1.31e-01        | 376         |                               |
| 85        | 1.04e-01        | 1490        |                               |
| 22        | 8.24e-02        | 396         |                               |
| 10        | 7.70e-02        | 123         |                               |
| 44        | 7.05e-02        | 743         |                               |
| 63        | 6.94e-02        | 1090        |                               |
| 67        | 6.09e-02        | 1118        |                               |
| 46        | 6.06e-02        | 760         |                               |
| 84        | 4.74e-02        | 1461        |                               |
| 18        | 3.25e-02        | 304         |                               |
| 54        | 2.51e-02        | 906         |                               |
| 79        | 2.11e-02        | 1371        |                               |
| 77        | 1.39e-02        | 1303        |                               |
| 103       | 1.20e-02        | 3269        |                               |
| 65        | 1.18e-02        | 1097        |                               |
| 61        | 8.34e-03        | 941         |                               |

|     |          |      |
|-----|----------|------|
| 82  | 5.80e-03 | 1422 |
| 95  | 4.74e-03 | 3245 |
| 53  | 4.18e-03 | 873  |
| 101 | 3.34e-03 | 3264 |
| 69  | 3.16e-03 | 1126 |
| 97  | 1.84e-03 | 3249 |
| 2   | 1.14e-03 | 20   |
| 64  | 1.03e-03 | 1090 |
| 94  | 8.96e-04 | 3245 |
| 105 | 6.34e-04 | 3292 |
| 43  | 6.08e-04 | 742  |
| 104 | 4.74e-04 | 3292 |
| 13  | 4.72e-04 | 170  |
| 99  | 4.60e-04 | 3260 |
| 45  | 3.88e-04 | 759  |
| 14  | 2.89e-04 | 172  |
| 71  | 2.67e-04 | 1189 |
| 92  | 2.41e-04 | 1589 |
| 5   | 2.38e-04 | 35   |
| 4   | 2.16e-04 | 31   |
| 7   | 1.83e-04 | 67   |
| 6   | 1.37e-04 | 55   |
| 1   | 1.21e-04 | 18   |
| 86  | 1.03e-04 | 1494 |
| 37  | 1.03e-04 | 640  |
| 8   | 8.66e-05 | 71   |
| 68  | 7.98e-05 | 1124 |
| 9   | 6.66e-05 | 83   |
| 36  | 6.40e-05 | 628  |
| 96  | 4.55e-05 | 3247 |
| 87  | 4.49e-05 | 1502 |
| 83  | 3.81e-05 | 1440 |
| 19  | 3.33e-05 | 335  |
| 70  | 2.81e-05 | 1161 |
| 27  | 2.67e-05 | 487  |
| 66  | 2.53e-05 | 1104 |
| 16  | 2.47e-05 | 272  |
| 23  | 2.32e-05 | 421  |
| 56  | 2.27e-05 | 914  |
| 15  | 2.26e-05 | 231  |
| 52  | 2.14e-05 | 872  |
| 102 | 2.01e-05 | 3266 |
| 80  | 1.91e-05 | 1382 |
| 34  | 1.67e-05 | 609  |
| 48  | 1.51e-05 | 784  |
| 33  | 1.45e-05 | 601  |
| 26  | 1.29e-05 | 463  |
| 17  | 1.29e-05 | 285  |
| 57  | 1.21e-05 | 915  |
| 50  | 1.17e-05 | 831  |
| 58  | 1.10e-05 | 923  |
| 42  | 1.09e-05 | 732  |
| 24  | 1.06e-05 | 421  |
| 76  | 9.49e-06 | 1288 |
| 98  | 8.74e-06 | 3252 |
| 20  | 8.74e-06 | 347  |
| 78  | 8.02e-06 | 1338 |
| 47  | 7.98e-06 | 774  |



|     |          |      |
|-----|----------|------|
| 28  | 7.37e-06 | 514  |
| 74  | 7.23e-06 | 1252 |
| 40  | 6.94e-06 | 704  |
| 32  | 6.41e-06 | 592  |
| 60  | 5.74e-06 | 936  |
| 49  | 5.71e-06 | 784  |
| 31  | 4.83e-06 | 584  |
| 62  | 4.35e-06 | 945  |
| 25  | 3.93e-06 | 462  |
| 55  | 3.52e-06 | 911  |
| 100 | 3.22e-06 | 3260 |
| 11  | 2.62e-06 | 131  |
| 51  | 2.43e-06 | 831  |
| 29  | 2.22e-06 | 541  |
| 41  | 2.10e-06 | 704  |
| 81  | 1.77e-06 | 1417 |
| 30  | 1.33e-06 | 574  |
| 59  | 7.51e-07 | 936  |
| 90  | 1.68e-07 | 1559 |

### 3.10 *trans-cis-cis-trans*-pentathiophene in normal coordinates

| Mode      | $ \Delta_i $    | $\nu$       | type                          |
|-----------|-----------------|-------------|-------------------------------|
| <b>12</b> | <b>1.15e+00</b> | <b>167</b>  | <b>Inter-ring stretch</b>     |
| <b>91</b> | <b>1.05e+00</b> | <b>1586</b> | <b>Inter-ring C–C stretch</b> |
| <b>92</b> | <b>7.07e-01</b> | <b>1597</b> | <b>Inter-ring C–C stretch</b> |
| <b>37</b> | <b>6.74e-01</b> | <b>642</b>  | <b>Ring breathing</b>         |
| 39        | 5.68e-01        | 691         | Ring breathing                |
| 10        | 5.39e-01        | 119         |                               |
| 71        | 5.33e-01        | 1199        |                               |
| 3         | 4.58e-01        | 26          |                               |
| 89        | 3.77e-01        | 1541        |                               |
| 73        | 2.56e-01        | 1241        |                               |
| 21        | 2.34e-01        | 356         |                               |
| 18        | 2.17e-01        | 303         |                               |
| 76        | 1.99e-01        | 1276        |                               |
| 23        | 1.60e-01        | 421         |                               |
| 46        | 1.40e-01        | 756         |                               |
| 88        | 1.17e-01        | 1531        |                               |
| 64        | 1.09e-01        | 1092        |                               |
| 85        | 1.00e-01        | 1497        |                               |
| 67        | 8.78e-02        | 1122        |                               |
| 69        | 3.20e-02        | 1127        |                               |
| 54        | 2.20e-02        | 899         |                               |
| 53        | 2.13e-02        | 862         |                               |
| 82        | 1.57e-02        | 1417        |                               |
| 44        | 1.20e-02        | 739         |                               |
| 59        | 1.19e-02        | 925         |                               |
| 84        | 1.17e-02        | 1463        |                               |
| 103       | 1.13e-02        | 3269        |                               |
| 65        | 6.77e-03        | 1101        |                               |
| 95        | 5.68e-03        | 3243        |                               |
| 101       | 4.79e-03        | 3261        |                               |
| 34        | 3.93e-03        | 614         |                               |
| 93        | 3.03e-03        | 1598        |                               |
| 77        | 2.83e-03        | 1301        |                               |
| 97        | 2.71e-03        | 3243        |                               |
| 100       | 2.30e-03        | 3257        |                               |

|     |          |      |
|-----|----------|------|
| 13  | 1.39e-03 | 168  |
| 99  | 1.16e-03 | 3257 |
| 94  | 9.48e-04 | 3243 |
| 79  | 8.93e-04 | 1354 |
| 68  | 6.27e-04 | 1125 |
| 105 | 5.03e-04 | 3291 |
| 45  | 4.70e-04 | 754  |
| 104 | 4.66e-04 | 3291 |
| 86  | 3.52e-04 | 1498 |
| 8   | 3.13e-04 | 72   |
| 4   | 2.48e-04 | 36   |
| 63  | 1.72e-04 | 1090 |
| 6   | 1.68e-04 | 58   |
| 75  | 1.57e-04 | 1270 |
| 14  | 1.54e-04 | 171  |
| 9   | 1.44e-04 | 82   |
| 2   | 1.36e-04 | 24   |
| 11  | 1.03e-04 | 133  |
| 87  | 8.72e-05 | 1508 |
| 5   | 8.11e-05 | 40   |
| 1   | 7.65e-05 | 19   |
| 15  | 5.84e-05 | 231  |
| 90  | 5.70e-05 | 1561 |
| 52  | 5.29e-05 | 862  |
| 72  | 4.09e-05 | 1232 |
| 24  | 3.97e-05 | 422  |
| 7   | 3.87e-05 | 70   |
| 22  | 2.90e-05 | 420  |
| 20  | 2.80e-05 | 351  |
| 83  | 2.69e-05 | 1445 |
| 66  | 2.46e-05 | 1110 |
| 36  | 2.46e-05 | 619  |
| 78  | 2.27e-05 | 1334 |
| 17  | 2.09e-05 | 285  |
| 74  | 2.05e-05 | 1261 |
| 30  | 1.96e-05 | 570  |
| 96  | 1.51e-05 | 3243 |
| 19  | 1.49e-05 | 334  |
| 102 | 1.42e-05 | 3264 |
| 80  | 1.40e-05 | 1383 |
| 43  | 1.34e-05 | 739  |
| 25  | 1.31e-05 | 462  |
| 29  | 1.25e-05 | 543  |
| 50  | 1.09e-05 | 833  |
| 48  | 8.13e-06 | 785  |
| 40  | 6.06e-06 | 707  |
| 55  | 5.85e-06 | 906  |
| 58  | 5.30e-06 | 916  |
| 57  | 4.79e-06 | 915  |
| 61  | 4.66e-06 | 937  |
| 38  | 3.81e-06 | 672  |
| 49  | 3.80e-06 | 785  |
| 16  | 3.76e-06 | 260  |
| 33  | 3.25e-06 | 612  |
| 62  | 3.23e-06 | 939  |
| 70  | 2.96e-06 | 1162 |
| 47  | 2.95e-06 | 774  |
| 56  | 2.94e-06 | 912  |

|    |          |      |
|----|----------|------|
| 32 | 2.86e-06 | 601  |
| 42 | 2.85e-06 | 732  |
| 31 | 2.58e-06 | 581  |
| 41 | 2.49e-06 | 707  |
| 81 | 2.40e-06 | 1396 |
| 60 | 2.40e-06 | 937  |
| 51 | 1.69e-06 | 833  |
| 27 | 1.41e-06 | 491  |
| 26 | 9.15e-07 | 469  |
| 98 | 8.95e-07 | 3251 |
| 28 | 4.43e-07 | 524  |
| 35 | 3.04e-07 | 615  |

## 4 Excited-state structures

The applied excited-state equilibrium structures [TDDFT/CAM-B3LYP/6-31+g(d)] for the different oligothiophenes, conformations, and models for a luminescent biomarker are provided in separate files in xyz format in structures.xyz.zip. The naming of the files is listed in Table S-13.

Table S-13: Naming of the separate xyz files with the excited-state structures [TDDFT/CAM-B3LYP/6-31+g(d)] and the figures in the main text, where they are depicted.

| Molecule                                        | File name                  | Depicted in the main text in |
|-------------------------------------------------|----------------------------|------------------------------|
| <i>trans</i> -bithiophene                       | 2T_trans.xyz               | Figs. 2(c)–(f)               |
| <i>cis</i> -bithiophene                         | 2T_cis.xyz                 | Fig. 2(g), Fig. 6(a)         |
| <i>all-trans</i> -terthiophene                  | 3T_all-trans.xyz           | Figs. 2(c)–(d), 5(a)–(b)     |
| <i>all-trans</i> -quaterthiophene               | 4T_all-trans.xyz           | Figs. 5(c)–(d)               |
| <i>all-trans</i> -pentathiophene                | 5T_all-trans.xyz           | Figs. 5(e)–(f)               |
| <i>trans-cis-cis-trans</i> -pentathiophene      | 5T_trans_cis_cis_trans.xyz | Fig. 6(b)                    |
| <i>all-cis</i> -pentathiophene                  | 5T_all-cis.xyz             | Fig. 6(c)                    |
| <i>all-trans</i> -terthiophene biomarker models |                            |                              |
| with two acid groups                            | 3T_all-trans_2groups.xyz   | Figs. 7(a)–(b)               |
| with four acid groups                           | 3T_all-trans_4groups.xyz   | Fig. 7(c)                    |
